# Supplementary material for: Enhancement of fermentative bioenergy (ethanol/hydrogen) production using ultrasonication of Scenedesmus obliquus YSW15 cultivated in swine wastewater effluent
Source: Royal Society of Chemistry journal article supplement (doi:10.1039/c1ee01068a), 2011-01-01
Supplement: c1ee01068a.pdf [file c1ee01068a.pdf]

## Supplementary Information

### LSU-rRNA (D1-D2) coding region amplification and sequence

PCR amplification of the genomic DNA isolated from microalga with the universal forward and reverse primers was conducted. A single band of amplified LSU rDNA (D1-D2) product with a size of ~ 850-bp was recorded. The LSU-rRNA gene has a higher evolutionary rate compared with the SSU-rRNA gene<sup>1</sup> and should offer a better tool for the discrimination of closely related species using short diagnostic sequences. The DNA sequence was published in the NCBI databases under the specific accession number (HM103382). The phylogenetic tree constructed using MEGA 4.0 for the isolated strain (*S. obliquus* YSW15) was obtained from the LSU-rDNA D1-D2 sequence (SI Fig. 1). The LSU-rDNA sequence analysis showed that the isolated YSW15 can be ascribed to the *S. obliquus* AF183482 with a similarity of 97% (SI Table 1).

SI Table 1. The accession number, base pair length of the DNA fragment, and the similarity between amplified sequence and the closest relative sequence of the microalgae isolated from Wonju Wastewater Treatment Plant

| Microalgae strain                 | Accession number | Length (nt <sup>a</sup> ) | Closest relative and GenBank accession number | Similarity (%) |
|-----------------------------------|------------------|---------------------------|-----------------------------------------------|----------------|
| <i>Scenedesmus obliquus</i> YSW15 | HM103382         | 864                       | <i>Scenedesmus obliquus</i> AF183482          | 97             |

<sup>a</sup> nucleotide

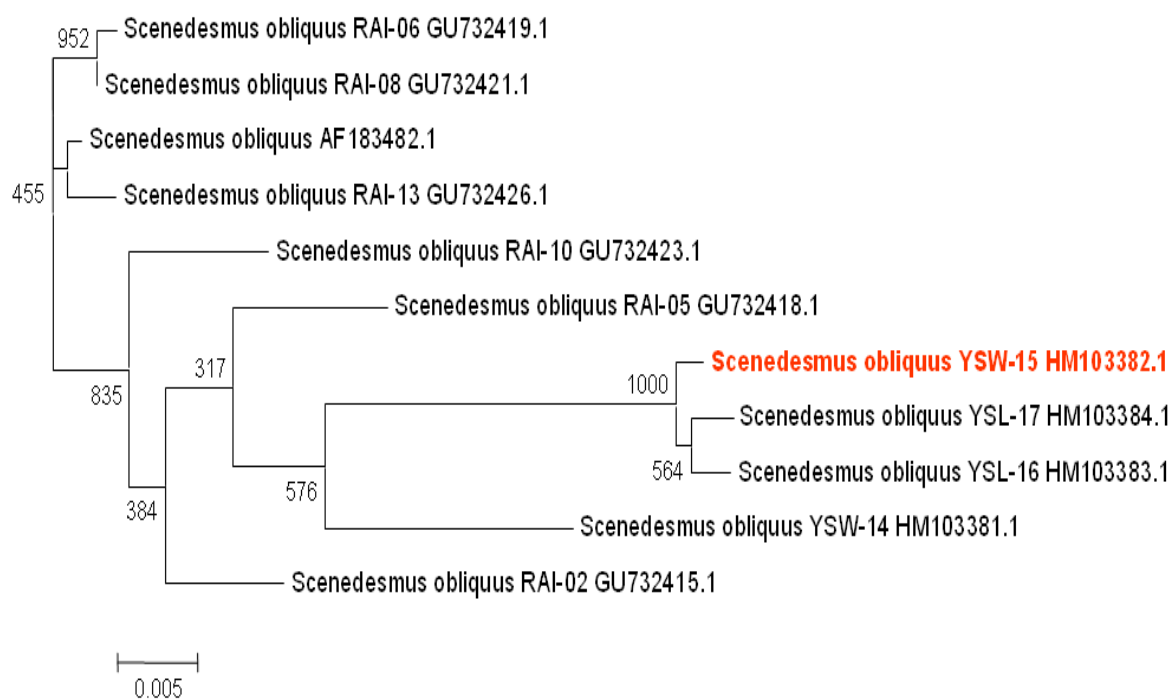

SI Fig 1. Phylogenetic tree showing the relationship between the LSU rDNA D1-D2 sequence of *Scenedesmus obliquus* YSW15 and the most similar sequences retrieved from the GenBank database.

## Reference

1. R. Sonnenberg, A. W. Nolte, D. Tautz, *Front Zool.*, **4**, 1-12.
